# Supplementary material for: A protein phosphatase 2C, AP2C1, interacts with and negatively regulates the function of CIPK9 under potassium-deficient conditions in Arabidopsis
Source: PubMed Central journal article supplement (PMC6054203; doi:10.1093/jxb/ery182), 2018-05-15
Supplement: ery182_suppl_supplementary_table.pdf [file ery182_suppl_supplementary_table.pdf]

**Table S1: List of primers used for various constructs preparations and qPCR analyses**

| Purpose                | Vector                    | Primer            | Sequence                          |
|------------------------|---------------------------|-------------------|-----------------------------------|
| Y2H/Localization       | pGAD/pGBT/GFP             | AP2C1F BamHI      | 5'TGGATCCTATGTCTTGCTCCGTCGCC3,    |
| Protein Expression     | pGEX4T-1/pET28a           | AP2C1F BamHI      | 5'AGGATCCATGTCTTGCTCCGTCGCC3'     |
| Arabidopsis OX         | pGKP479                   | AP2C1F BamHI      | 5'TGGATCCATGTCTTGCTCCGTCGCC3'     |
| BiFC, FRET             | p-ENTR/DTOPO, pSPYCE-35S  | AP2C1-TOPO-F      | 5'CACCATGTCTTGCTCCGTCGCC3'        |
| BiFC, FRET             | p-ENTR/DTOPO, pSPYCE-35S  | AP2C1-TOPO-R      | 5'TATGAACTGGCGTAAAGGG3'           |
| Y2H/Protein expression | pGAD/pGBT/pGEX4T-1/pET28a | AP2C1R Sall       | 5'CGTCGACCTATATGAACTGGCGTAAAGGG3' |
| Arabidopsis OX         | pGKP479                   | AP2C1R Sall       | 5'CGTCGACCTATATGAACTGGCGTAAAGGG3' |
| Localization           | GFP                       | AP2C1R Sall       | 5'CGTCGACGAACTGGCGTAAAGGGATC3'    |
| Y2H                    | pGAD/pGBT                 | K1F-BamHI         | 5'TGGATCCTATGTCTTGCTCCGTCGCC3'    |
| Y2H                    | pGAD/pGBT                 | K1R-Sall          | 5'AGTCGACCGGAGGAGGATGCAGA3'       |
| Y2H                    | pGAD/pGBT                 | K2F-BamHI         | 5'AGGATCCAGGTGTGCTGGATTGTAGC3'    |
| Y2H                    | pGAD/pGBT                 | K2/3/PP2Cc R-Sall | 5'CGTCGACCTATATGAACTGGCGTAAAGGG3' |
| Y2H                    | pGAD/pGBT                 | K3F-BamHI         | 5'AGGATCCAGGAGGTGTTTTAAAGAGGA'    |
| Y2H                    | pGAD/pGBT                 | PP2CcF-BamHI      | 5'AGGATCCAAGAGAGGAGTGTAGAGAG3'    |
| Y2H                    | pGAD/pGBT                 | KIM-F-BamHI       | 5'TGGATCCAGGAGGTGTTTTAAAGAGG3'    |
| Y2H                    | pGAD/pGBT                 | KIM-R-Sall        | 5'AGTCGACAATCGGTATATCAAGCC3'      |
| qPCR                   |                           | AP2C1 F-RT        | 5'GATCACCGCCCGTCTAGAGA3'          |
| qPCR                   |                           | AP2C1 R-RT        | 5'CCGTGAAACGTATCAACATATCCT3'      |
| qPCR                   |                           | AKT1 F            | 5'ATTCCCTCAGAGGCTGCTATGA3'        |
| qPCR                   |                           | AKT1 R            | 5'ACGCCAAAGACGAAGCATGT3'          |
| qPCR                   |                           | CIPK6 F           | 5'CGGAGTATCGCCGGTCAA3'            |
| qPCR                   |                           | CIPK6 R           | 5'CGTGTTTCCGGTGGCAAT3'            |
| qPCR                   |                           | HAK5 F            | 5'CATCACGAGCACTTCATGTCTG3'        |
| qPCR                   |                           | HAK5 R            | 5'CTCTGTTTGATCCTCCACGGA3'         |
| qPCR                   |                           | LOX2 F            | 5'GCATCCTCATTCCGCTACAC3'          |
| qPCR                   |                           | LOX2 R            | 5'CCACCTCCGTTGACAAGACTTT3'        |
